# Supplementary material for: Hydrangea-like δ-MnO2 anchored on GNS as a high-performance supercapacitor electrode material
Source: Royal Society of Chemistry journal article supplement (doi:10.1039/d4nj01851f), 2024-01-01
Supplement: d4nj01851f1.pdf [file d4nj01851f1.pdf]

## Supporting Information

### *Hydrangea-like $\delta$ -MnO<sub>2</sub> anchored on GNS as a high-performance supercapacitor electrode material*

Congshuang Li,<sup>a</sup> Yanhong Zhao,<sup>\*a</sup> Wei Zhang,<sup>a</sup> Fushun Xu<sup>a</sup>

*a*. College of Environmental and Chemical Engineering, Heilongjiang University of Science and Technology, Harbin, 150022, China.

\*. E-mail: zhaoyh08@126.com (Yanhong Zhao)

## Experimental data

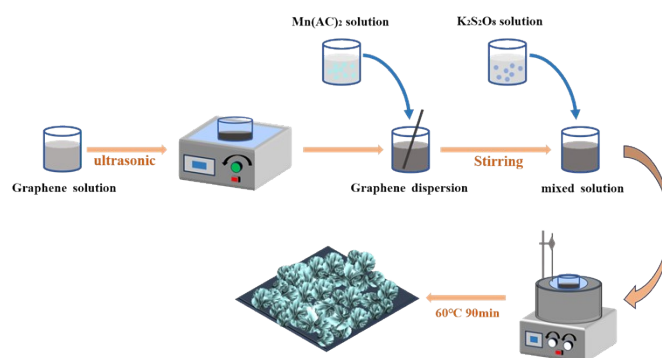

Figure 1. Schematic synthesis of  $\delta$ -MnO<sub>2</sub>/GNS

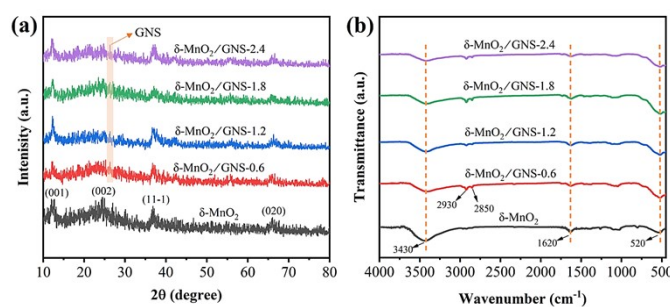

Figure 2. (a) XRD plots of  $\delta$ -MnO<sub>2</sub> and composites, (b) FTIR plots of  $\delta$ -MnO<sub>2</sub> and composites

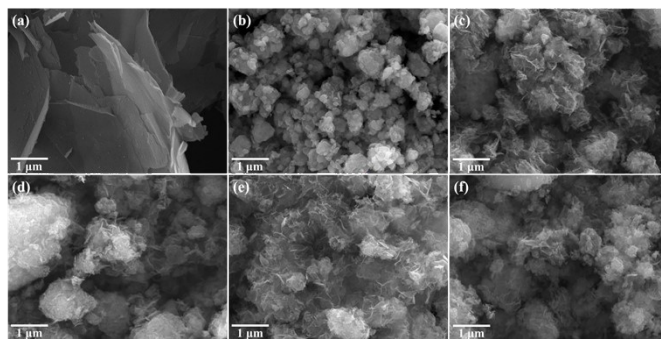

Figure 3. SEM image (a) GNS, (b)  $\delta$ -MnO<sub>2</sub>, (c)  $\delta$ -MnO<sub>2</sub>/GNS-0.6, (d)  $\delta$ -MnO<sub>2</sub>/GNS-1.2, (e)  $\delta$ -MnO<sub>2</sub>/GNS-1.8, (f)  $\delta$ -MnO<sub>2</sub>/GNS-2.4

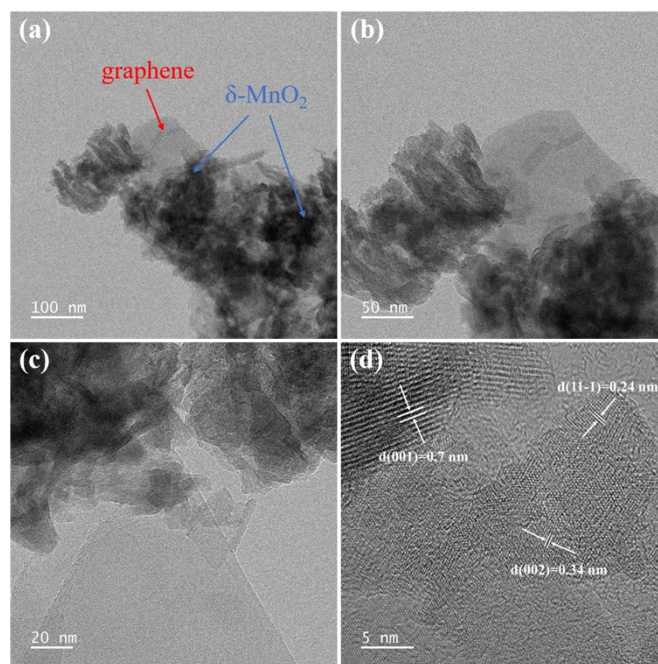

Figure 4. TEM image of  $\delta$ -MnO<sub>2</sub>/GNS-1.8. (a) 200 nm (b) 100 nm , (c) 20 nm, and (d) 5 nm

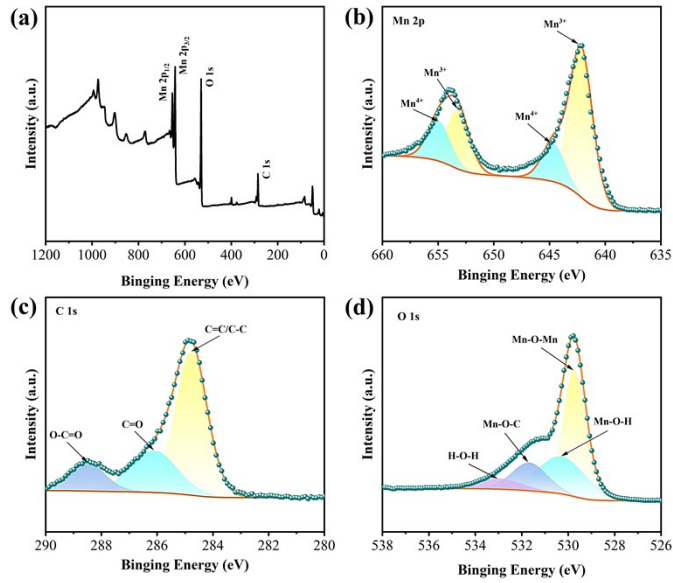

Figure 5. XPS spectra of  $\delta$ -MnO<sub>2</sub>/GNS-1.8 composite. (a) full spectrum, (b) Mn 2p spectrum, (c) Mn 3s spectrum, and (d) O 1s spectrum

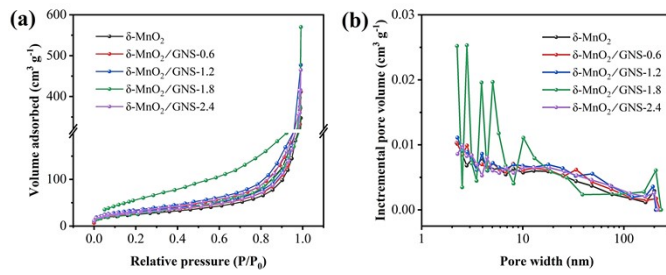

Figure 6. BET spectra of the synthesized materials. (a) Nitrogen adsorption/desorption isotherms, (b) pore size distribution

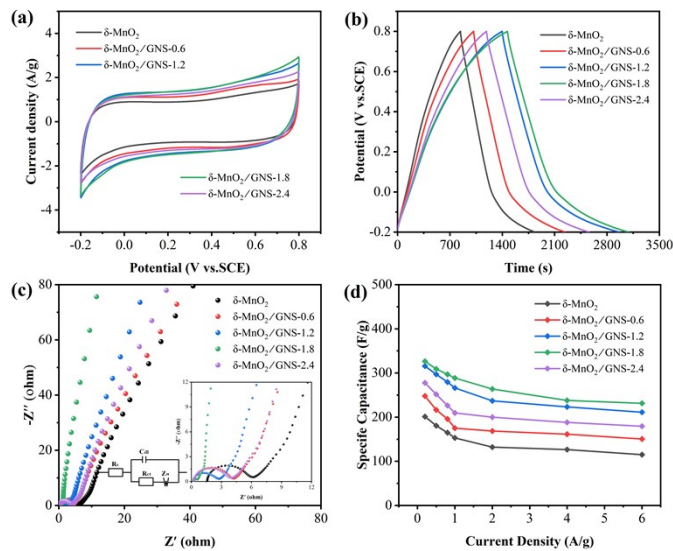

Figure 7. Electrochemical performance plots. (a) CV plot, (b) GCD plot, (c) EIS plot, (d) multiplicity performance plot

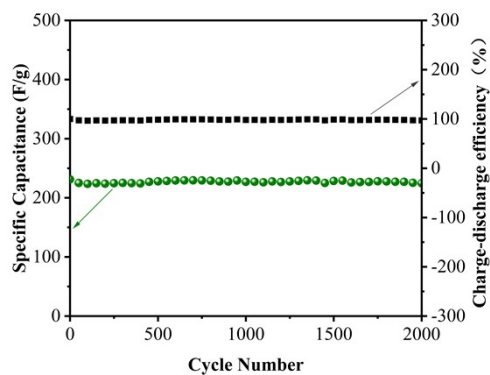

Figure 8.  $\delta$ -MnO<sub>2</sub>/GNS-1.8 at 6 A/g 2000 cycles

Table 1. Experimental results for the same type of electrode material

| Electrode material              | Potentiometric window | Specific capacitance | Ref       |
|---------------------------------|-----------------------|----------------------|-----------|
| CNT@CNT@MnO <sub>2</sub>        | 0-1.0 V               | 210 F/g 0.5 A/g      | 11        |
| HRGO/MnO <sub>2</sub>           | -0.2-0.8 V            | 270 F/g 0.5 A/g      | 34        |
| 3DHG-MnO <sub>2</sub>           | -0.2-0.8 V            | 192.2 F/g 0.5 A/g    | 35        |
| MnO <sub>2</sub> /rGO           | -0.2-1.0 V            | 255 F/g 0.5A/g       | 37        |
| N-PCNs/MnO <sub>2</sub>         | -0.1-0.9 V            | 295 F/g 0.5 A/g      | 41        |
| $\delta$ -MnO <sub>2</sub> /GNS | -0.2-0.8 V            | 309 F/g 0.5 A/g      | This work |
| $\delta$ -MnO <sub>2</sub> /GNS | -0.2-0.8 V            | 326.6 F/g 0.2 A/g    | This Work |

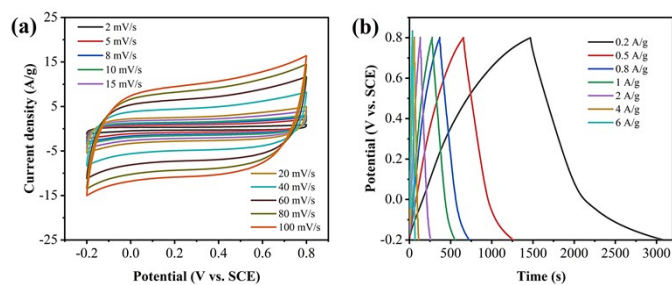

Figure 9. Electrochemical performance plots. (a) CV curves of  $\delta$ -MnO<sub>2</sub>/GNS-1.8 with different sweep speeds, (b) GCD curves of  $\delta$ -MnO<sub>2</sub>/GNS-1.8 with different current densities

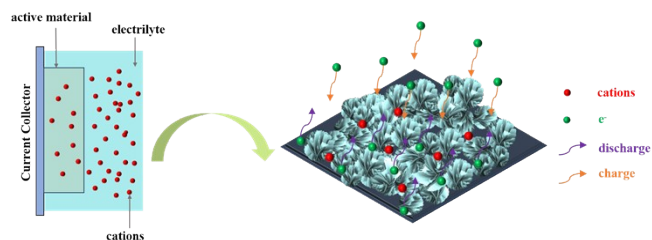

Figure 10. Electrochemical mechanism diagram of MnO<sub>2</sub>/GNS-1.8

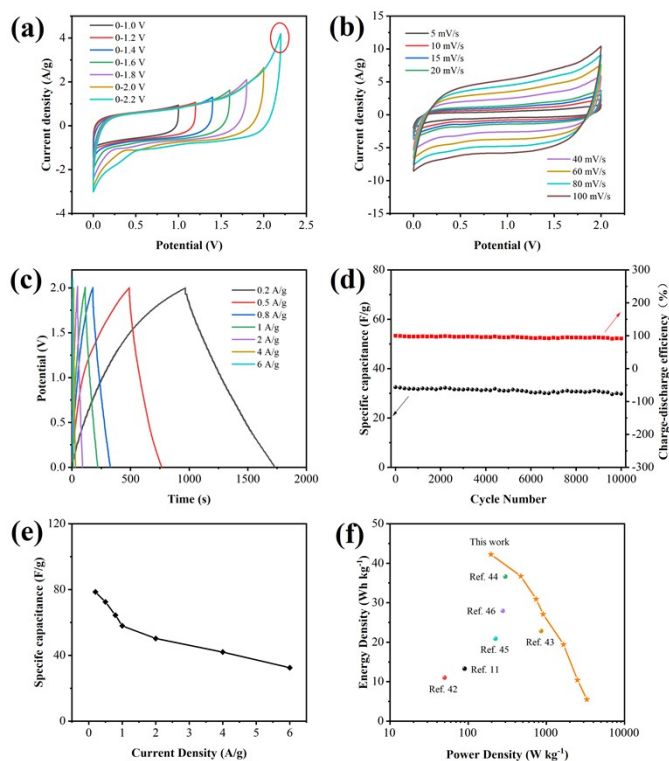

**Figure 11.** Performance diagram of  $\delta$ -MnO<sub>2</sub>/GNS//AC capacitor. (a) CV curves in different voltage windows at 10 mV/s scan rate, (b) CV curves at different scan rates, (c) GCD curves for different current densities, (d) 5000 consecutive charge/discharge cycles at 6 A/g current density, (e) Specific capacitance at different current densities, (f) Ragone diagram

**Table 2.** Table comparing the performance of  $\delta$ -MnO<sub>2</sub>/GNS//AC with other supercapacitor devices reported in the literature

| Asymmetric supercapacitors                                               | Working potential (V) | Energy Density (Wh/kg) | Power density (W/kg) | Ref       |
|--------------------------------------------------------------------------|-----------------------|------------------------|----------------------|-----------|
| CNT@CNT/MnO <sub>2</sub> /CNT@NCT                                        | 1.8                   | 13.3                   | 90                   | 11        |
| MnO <sub>2</sub> @Carbon black//AC                                       | 1.6                   | 11                     | 50                   | 42        |
| GF/CNT/MnO <sub>2</sub> //GF/CNT/Ppy                                     | 2.0                   | 22.8                   | 860                  | 43        |
| 3D-MnO <sub>2</sub> //AC                                                 | 2.0                   | 36.6                   | 300                  | 44        |
| N-CNTs/MnO <sub>2</sub> -2//N-CNTs                                       | 1.8                   | 20.9                   | 224                  | 45        |
| rGO/Mn <sub>3</sub> O <sub>4</sub> // rGO/Mn <sub>3</sub> O <sub>4</sub> | 0.8                   | 27.92                  | 277.8                | 46        |
| $\delta$ -MnO <sub>2</sub> /GNS//AC                                      | 2.0                   | 42.2                   | 196.8                | This work |
